# Supplementary material for: Early Phase of Specific Cellular Immune Status Associates with HCV Infection Outcomes in Marmosets
Source: MDPI journal article supplement (doi:10.3390/v15051082), 2023-04-28
Supplement: s1 [file s1]

# **Early phase of specific cellular immune status associates with HCV infection outcomes in marmosets**

Bochao Liu<sup>1,2\*</sup>, Enhui Zhang<sup>1\*</sup>, Xiaorui Ma<sup>1</sup>, Shengxue Luo<sup>1</sup>, Chong Wang<sup>1</sup>, Ling Zhang<sup>1</sup>, Wenjing Wang<sup>1</sup>, Yongshui Fu<sup>2</sup>, Jean-Pierre Allain<sup>3</sup>, Chengyao Li<sup>#1</sup>, Tingting Li<sup>#1</sup>

<sup>1</sup> Department of Transfusion Medicine, School of Laboratory Medicine and Biotechnology, Southern Medical University, Guangzhou, China;

<sup>2</sup> Guangzhou blood center, Guangzhou, China;

<sup>3</sup> Emeritus professor of transfusion medicine, University of Cambridge, UK.

\* These authors contributed equally to this work.

**# Corresponding author:** Tingting Li or Chengyao Li, Department of Transfusion Medicine, School of Laboratory Medicine and Biotechnology, Southern Medical University, No. 1838 North Guangzhou Avenue, Guangzhou, China.

Email: apple-ting-007@163.com (T Li); or chengyaoli@hotmail.com (C Li). Phone:

0086-20-61649360

**Table S1.** HCV and GBV-B peptides used in ELISpot assay

| No.         | Sequence  | Location |
|-------------|-----------|----------|
| HCV         |           |          |
| Core        |           |          |
| 1           | RGPRLGVRA | 40-48    |
| 2           | AQPGYPWPL | 77-85    |
| 3           | GYPWPLYGN | 80-88    |
| 4           | GSRPSWGPS | 102-110  |
| 5           | APLGGVARA | 142-150  |
| 6           | ARALAHGVR | 148-156  |
| 7           | GVRVLEDSV | 154-162  |
| E1          |           |          |
| 8           | DSVNYATGN | 160-168  |
| 9           | NLPGCSFSI | 168-176  |
| 10          | LTIPASAYE | 185-193  |
| 11          | TIPASAYEV | 186-194  |
| 12          | LTPTLAARN | 242-250  |
| 13          | ARNSSVPTK | 248-256  |
| 14          | PTKTIRRHV | 254-262  |
| 15          | SQLFTFSPR | 288-296  |
| 16          | FSPRRHETV | 293-301  |
| 17          | ETVQDCNCS | 299-307  |
| 18          | NCSLYPGHV | 305-313  |
| 19          | GHVSGHRMA | 311-319  |
| 20          | RMAWDMMMN | 317-325  |
| 21          | MNWSPTAAL | 324-332  |
| 22          | RIPQAVVDM | 339-347  |
| E2p7        |           |          |
| 23          | FSLGPTQRI | 403-411  |
| 24          | GPTQRIQLV | 406-414  |
| 25          | ASCRPIDKF | 457-465  |
| 26          | SSDQRPYCW | 479-487  |
| 27          | TTDRSGVPT | 518-526  |
| 28          | TRPPQGNWF | 542-550  |
| 29          | RPPQGNWFG | 543-551  |
| 30          | GPPCNIGGV | 566-574  |
| 31          | SGPWLTPRC | 599-607  |
| 32          | MVDYPYRLW | 608-616  |
| 33          | TTLPALSTG | 680-688  |
| 34          | HLHQNIVDV | 691-699  |
| GBV-B       |           |          |
| CoreE1E2p13 |           |          |

|        |           |           |
|--------|-----------|-----------|
| 1      | ISTQTSPVP | 4-12      |
| 2      | TSPVPAPRT | 8-16      |
| 3      | QTQASYPVS | 21-29     |
| 4      | KSRNLGILL | 83-91     |
| 5      | LLDYPLGWI | 90-98     |
| 6      | DVTTHTPLV | 100-108   |
| 7      | HTPLVGPLV | 104-112   |
| 8      | VGPLVAGAV | 108-116   |
| 9      | ATGWFGVHL | 134-142   |
| 10     | TGWFGVHLF | 135-143   |
| 11     | CSPSTCLHE | 181-189   |
| 12     | YSPKWTRPI | 387-395   |
| 13     | VTPWLTTAW | 457-465   |
| 14     | DTPIVYFYD | 501-509   |
| 15     | RLPGTPPVV | 523-531   |
| 16     | VGPWOLVAL | 712-720   |
| 17     | GPWPLVALL | 713-721   |
| NS2-5B |           |           |
| 18     | KSDDPYWCV | 850-858   |
| 19     | HATDATTVL | 1023-1031 |
| 20     | VIPTPHANI | 1058-1066 |
| 21     | PTPHANITE | 1060-1068 |
| 22     | LTDEGTIPF | 1071-1079 |
| 23     | CTPSGMVPE | 1209-1217 |
| 24     | RTQPGLPAI | 1246-1254 |
| 25     | RTADNYVLL | 1280-1288 |
| 26     | STITTTSPF | 1633-1641 |
| 27     | ITTPLPHKI | 1690-1698 |
| 28     | LTDARGALA | 1713-1721 |
| 29     | HTPGVRMQL | 2060-2068 |
| 30     | TTKLPAISI | 2117-2125 |
| 31     | TATTASSYV | 2232-2240 |
| 32     | IVPKEEVFV | 2412-2420 |
| 33     | ITPEDIMVE | 2499-2507 |
| 34     | LSDQHRAGI | 2516-2522 |
| 35     | CVPQPKYSL | 2623-2631 |
| 36     | KSGKPYYFL | 2647-2655 |
| 37     | LTRDPRIPL | 2655-2663 |
| 38     | YSPEGDVFI | 2825-2833 |

---

Note: these peptides were derived from the amino acid sequences of HCV-CE1E2p7 chimera (GenBank: KF285483.1) and GBV-B (GenBank: NC\_001655.1) structural and non-structural proteins.

**Table S2.** Histopathological scoring of liver tissues from HCV chimera and GBV-B infected marmosets

| Virus                          | Marmoset | Time point (week) | Necroinflammatory Grade          |                                              |                     | Total |
|--------------------------------|----------|-------------------|----------------------------------|----------------------------------------------|---------------------|-------|
|                                |          |                   | Periportal +/- bridging necrosis | Intralobular degeneration and focal necrosis | Portal inflammation |       |
| HCV chimera infected marmosets | M37      | W43               | 0                                | 3                                            | 1                   | 4     |
|                                | M38      | W43               | 1                                | 3                                            | 1                   | 5     |
|                                | M43      | W43               | 0                                | 3                                            | 1                   | 4     |
|                                | M45      | W17               | 0                                | 4                                            | 1                   | 5     |
| GBV-B infected marmosets       | M40      | W15               | 0                                | 1                                            | 1                   | 2     |
|                                | M41      | W43               | 0                                | 1                                            | 0                   | 1     |
|                                | M44      | W43               | 0                                | 2                                            | 1                   | 3     |
|                                | M46      | W43               | 0                                | 1                                            | 0                   | 1     |

Note: Necroinflammatory grade was scored by the modified HAI system. The histological status was determined by the modified HAI system (Kondell score), which grades necrosis and inflammation on a scale of 0 to 18 (periportal inflammation and necrosis, 0 to 10; lobular inflammation and necrosis, 0 to 4; portal inflammation, 0 to 4).

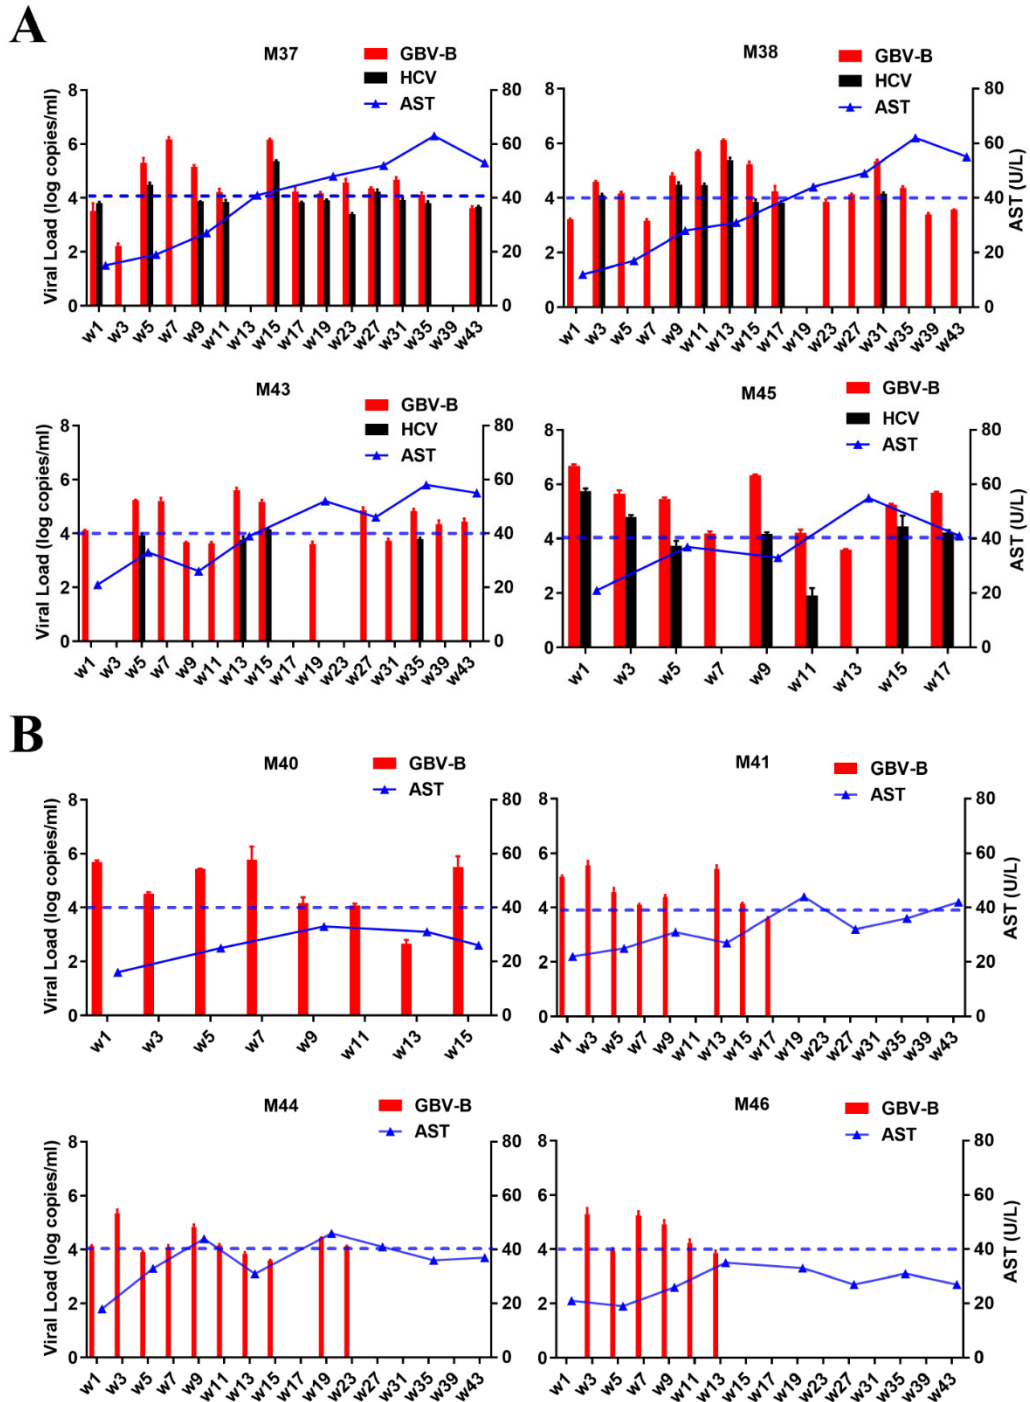

**Figure S1.** Detection of viremia or AST in serum from HCV chimera (A) and GBV-B infected marmosets (B). Viral RNA was measured by RT-qPCR with primers targeting the GBV-B 5' NCR (red) or HCV core (black).

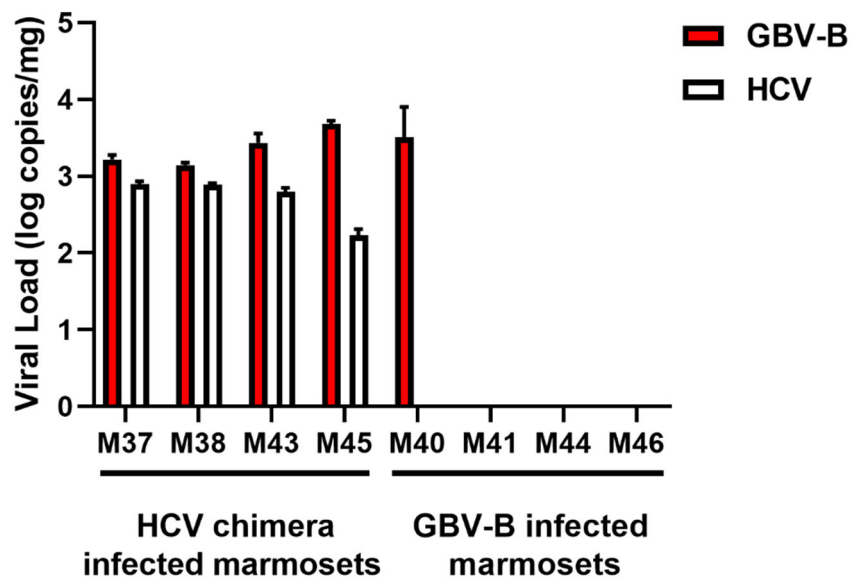

**Figure S2.** The quantification of viral load in liver tissues from the endpoint of HCV chimera or GBV-B infected marmosets. Hepatocyte viral load (log<sub>10</sub> copies/mg) was quantified by RT-qPCR with primers targeting the GBV-B 5' NCR (red) or HCV core (white).

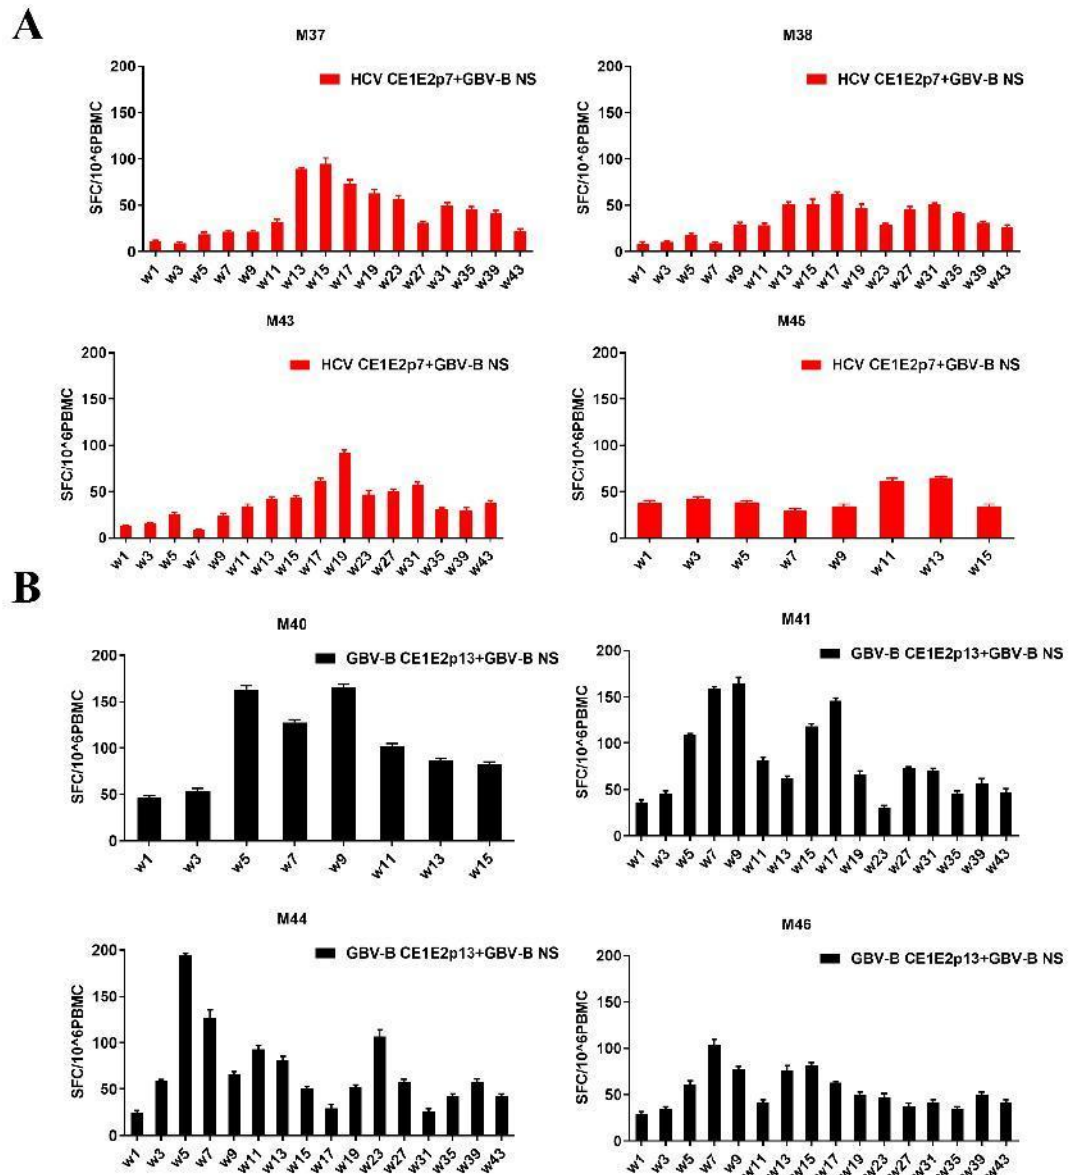

**Figure S3.** The specific IFN- $\gamma$  secreting T-cell response of PBMCs (SFC/10<sup>6</sup> cells) detected from HCV chimera (A) and GBV-B infected marmosets (B).

**A**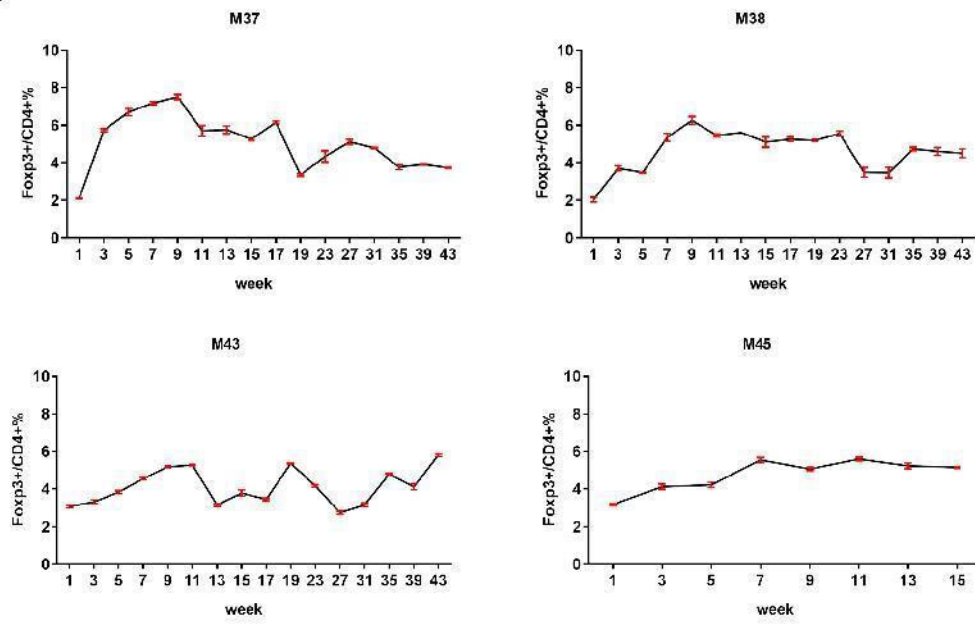**B**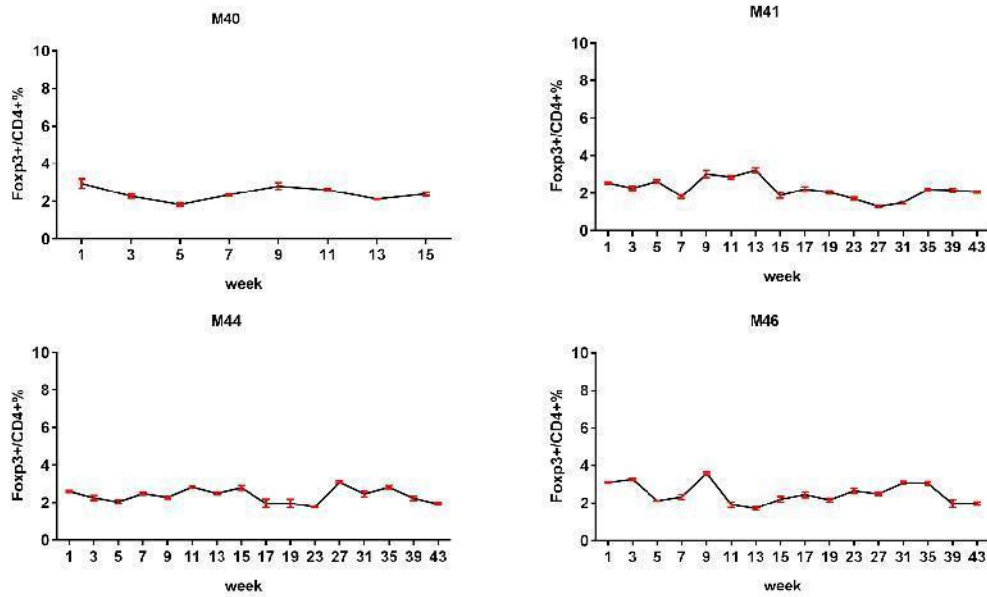

**Figure S4.** The percentage of Treg cells among lymphocytes from HCV chimera (A) and GBV-B infected marmosets (B).



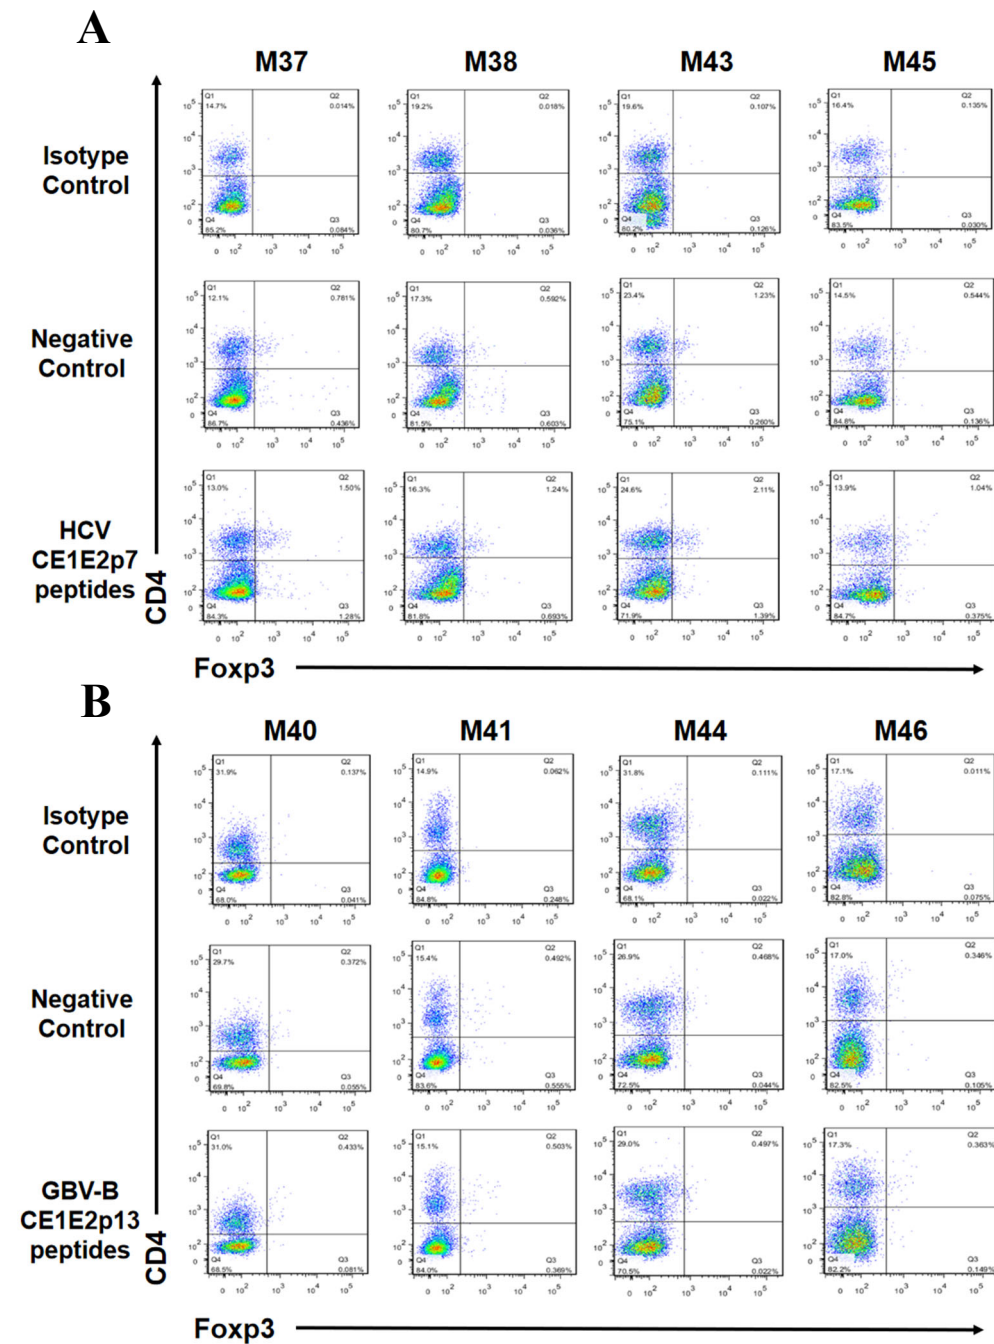

**Figure S5.** Frequency of Treg cells in PBMCs from HCV chimera or GBV-B infected marmosets was measured by flow cytometry. (A) Treg cells in PBMCs stimulated *in vitro* with HCV structural protein peptide pool from HCV chimera infected marmosets. (B) Treg cells in PBMCs stimulated *in vitro* with GBV-B structural protein peptide pool from GBV-B infected marmosets.

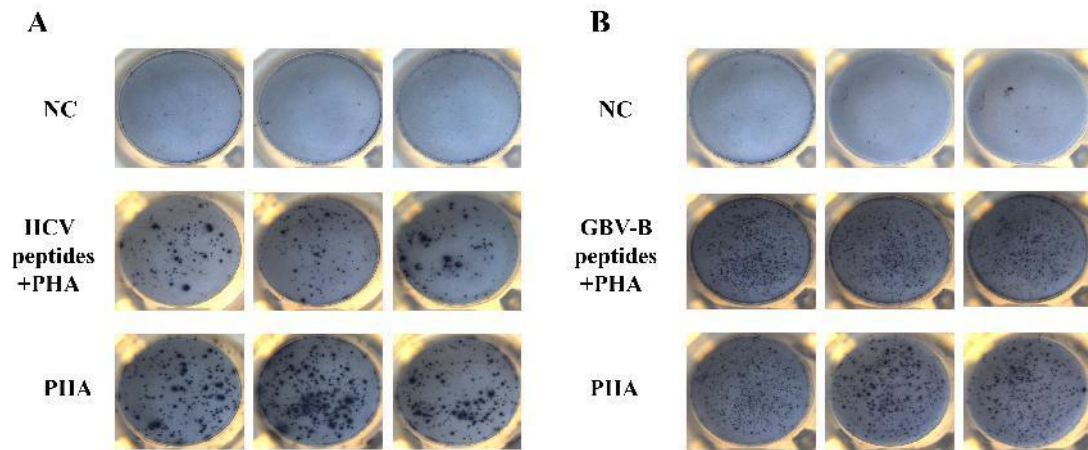

**Figure S6.** IFN-  $\gamma$  secretion T cell response was measured in PBMCs stimulated with HCV or GBV-B structural protein peptides plus PHA or PHA only. (A) Testing of IFN-  $\gamma$  secretion T cell response of PBMCs containing Treg cells from HCV chimera infected marmosets. (B) Testing of IFN-  $\gamma$  secretion T cell response of PBMCs containing Treg cells from GBV-B infected marmosets.
